# Supplementary material for: Unusual bilateral ovarian metastases from ileal gastrointestinal stromal tumor (GIST): a case report
Source: PubMed Central journal article supplement (PMC5857138; doi:10.1186/s12885-018-4204-1), 2018-03-16
Supplement: 12885_2018_4204_MOESM1_ESM.pdf [file 12885_2018_4204_MOESM1_ESM.pdf]

**November 2016**

Uterine prolapse

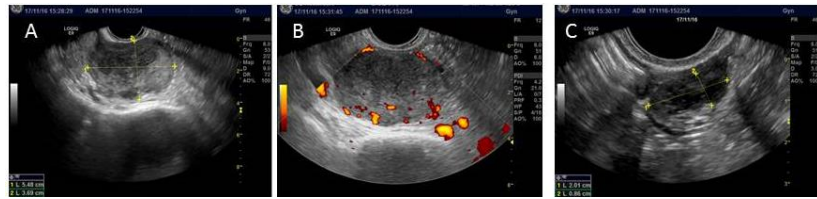

**TV-US**  
solid hypoechoic pelvic mass

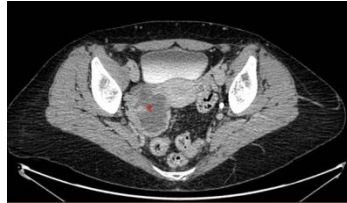

**CT-scan**

expansive right adnexal lesion, with lobulated margins and heterogeneous enhancement

**January 2017**

Surgery

ileal loop resection, hysterectomy,  
bilateral salpingo-oophorectomy,  
pelvic peritonectomy, peritoneal washing

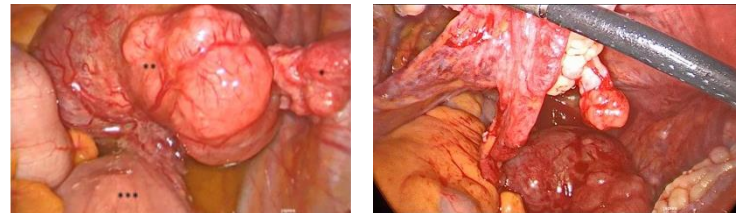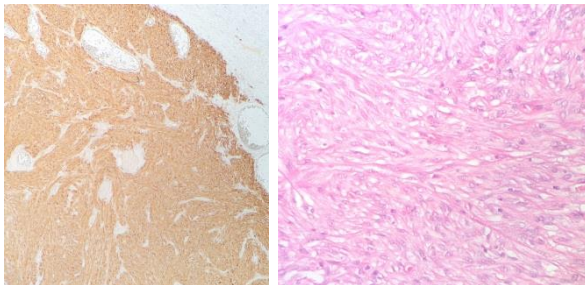

**Diagnosis**

GIST (spindle cell type) of small bowel with  
bilateral ovarian metastases  
KIT exon 11 mutation (p.M552\_W557)

**February 2017**  
Adjuvant imatinib

Alive, no recurrence
